# Supplementary material
Source: MDPI journal article supplement (https://www.mdpi.com/2073-4395/12/7/1658)
Supplement: s1 [file s1]

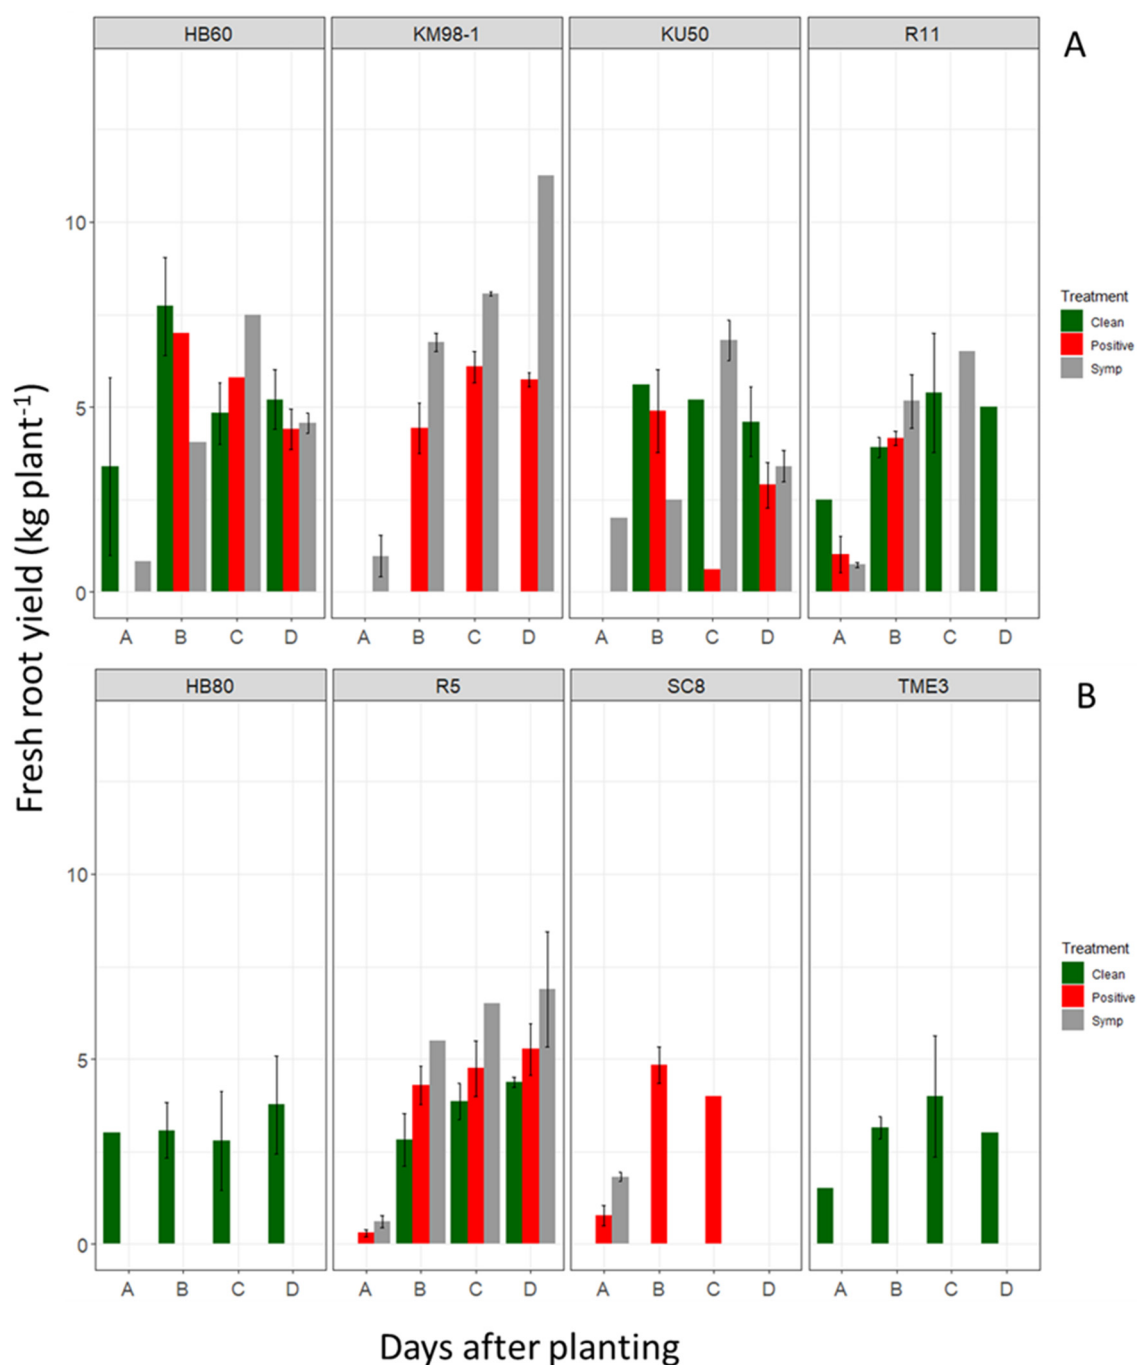

**Figure S1** (Season 2019-2020) Fresh root yield (kg/plant) of cassava infected with cassava mosaic disease (CMD) at after 60 (A), 150 (B) and 270 (C) days of planting (DAP) and asymptomatic plants (D) at harvest of popular cassava varieties in Southeast Asia using disease-free stakes (clean), positive selected stakes from diseased fields (positive selection) and stakes selected from symptomatic plants (symptomatic). Bars are standard errors of the mean (n=3 to 4). Clean TME3 and HB80 were planted as scarcity of clean planting material of SC8 and KM98-1.

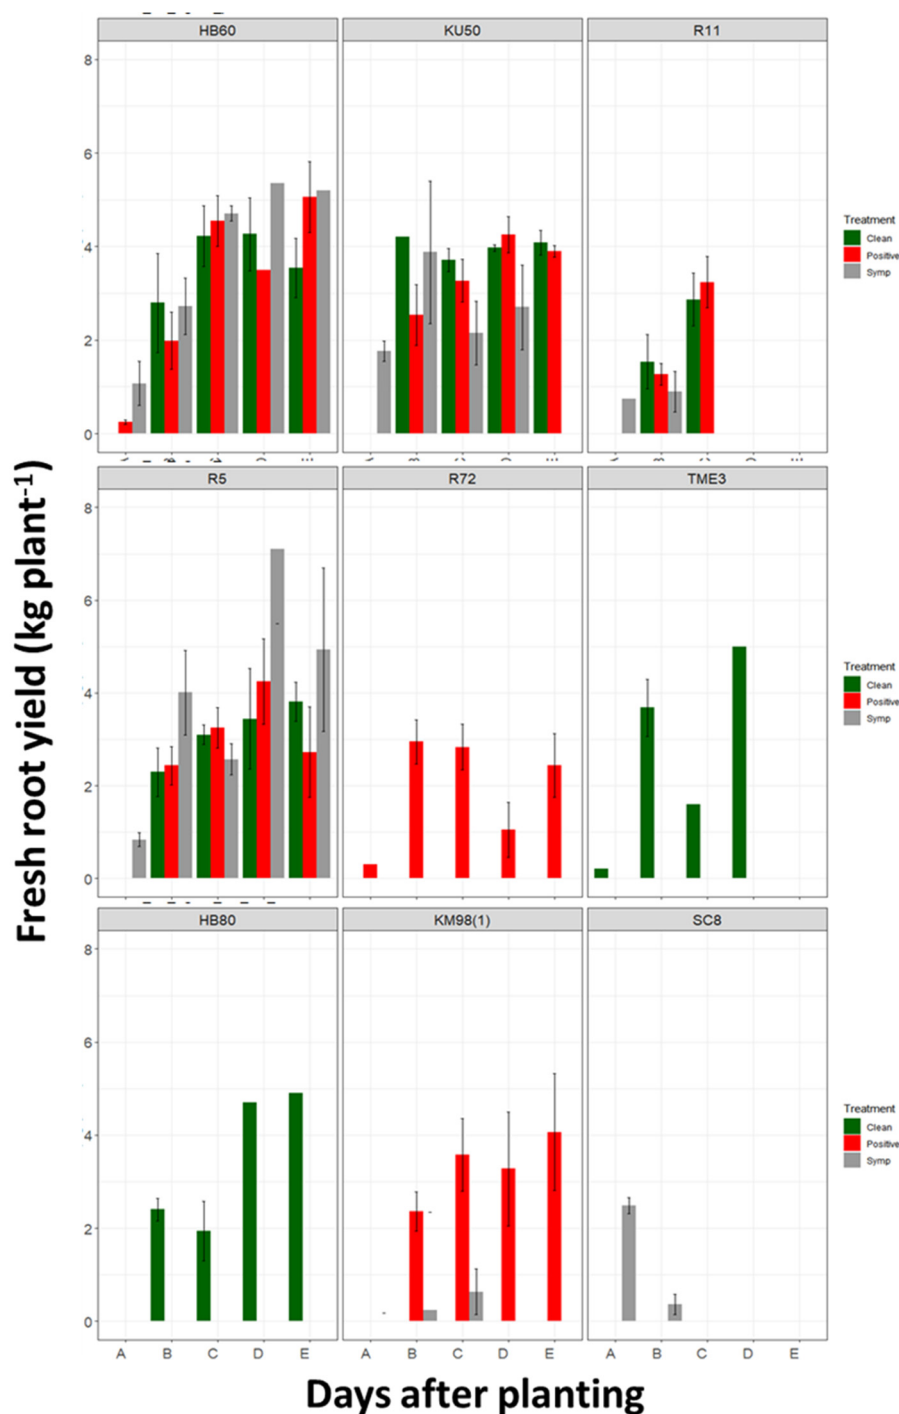

Figure S2. (season 2020-2021) Fresh tuber yield (kg/plant) of cassava infected with cassava mosaic disease (CMD) at after 26 (A), 64 (B), 156(C) and 278 (D) days of planting (DAP) and asymptomatic (E) plants at harvest of popular cassava varieties in Southeast Asia using disease-free stakes (clean), positive selected stakes from diseased fields (positive selection) and stakes selected from symptomatic plants (symptomatic). Bars are standard errors of the mean (n=3 to 4). Clean TME3, positive selected R72 and clean HB80 were planted as scarcity of clean planting material of SC8 and KM98-1.

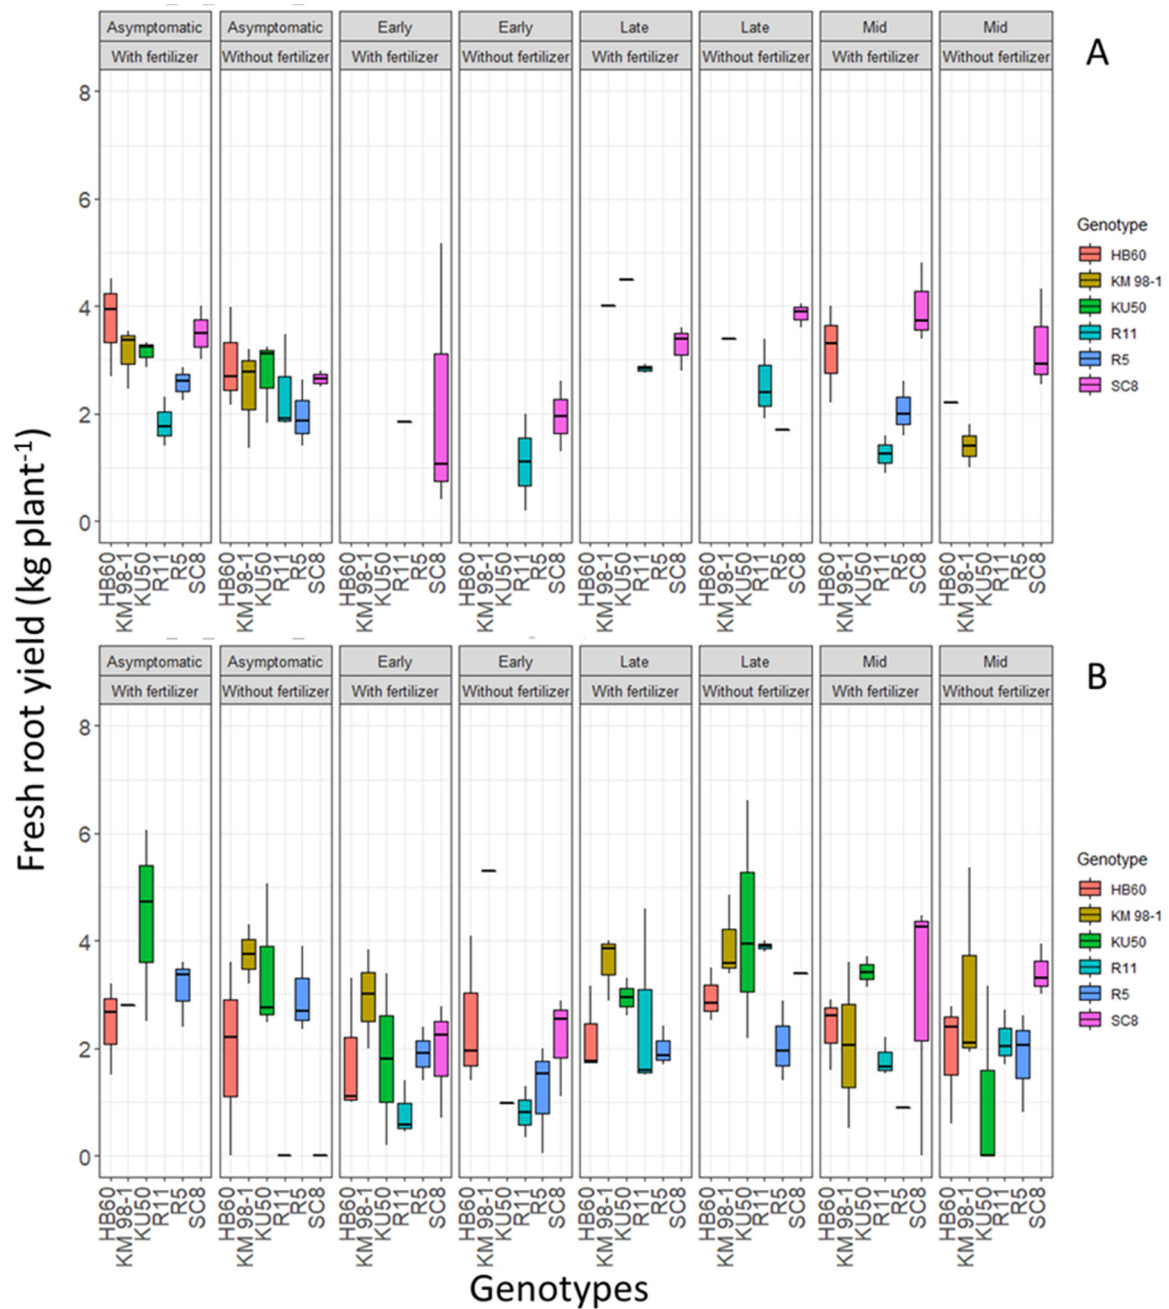

Figure S3. (season 2018-2019) Fresh root yield (kg plant<sup>-1</sup>) of six cassava varieties displaying CMD symptoms early, mid, or late (60, 150, or 270 days after planting, respectively) during the 2018-2019 season at site 1 (A) and site 2 (B), without fertilizer application and with fertilizer (80-20-80) application.

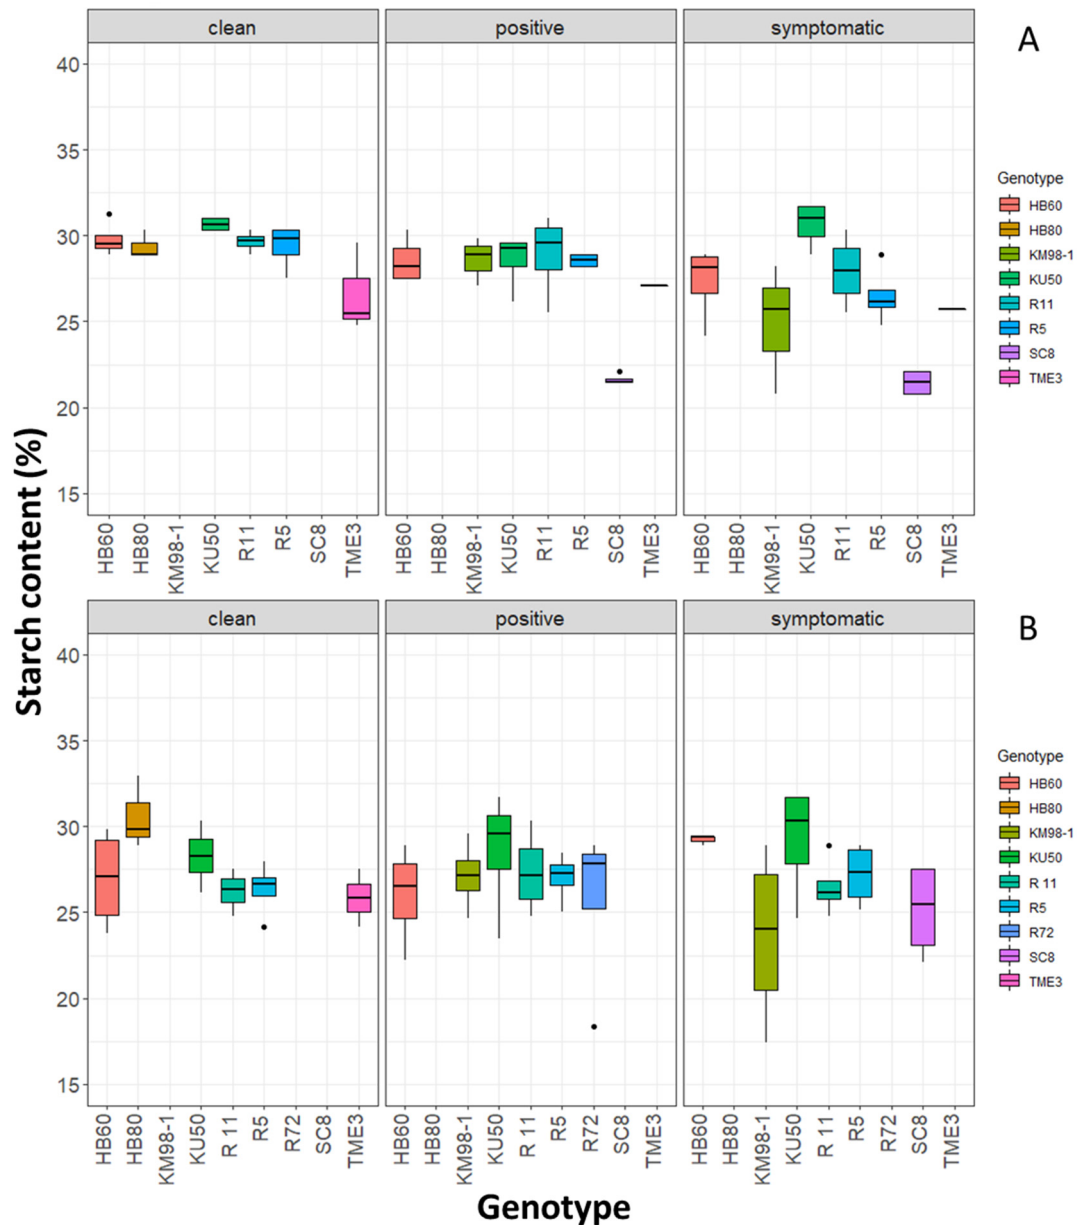

Figure S4. Starch content (%) cassava varieties in Southeast Asia using disease-free stakes (clean), positive selected stakes from diseased fields (positive selection) and stakes selected from symptomatic plants (symptomatic) of during 2019-2020 season (A) and 2020-2021 season (B). Twelve plants were harvested from each plot. TME3 and Huaybong80 (HB80) were planted as clean planting material due to the scarcity of clean planting material of SC8 and KM98-1, respectively, and Rayong72 (R72) was planted as positive selected plant in place of SC8 during 2020-2021 season. There was no significant difference between positive selected and symptomatic stakes, however, it was significant different from clean plants for 2019-2020 seasons; and there was no significant difference between treatment in 2020-2021 season.

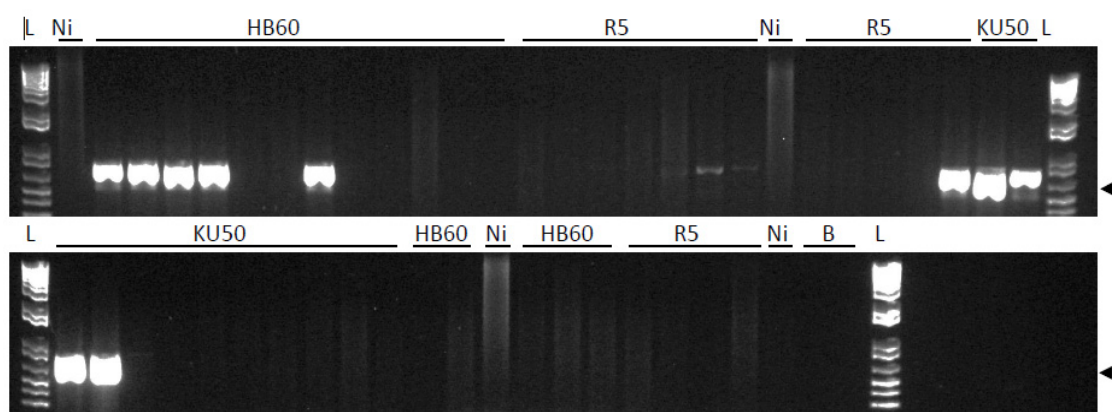

**Figure S5.** PCR detection of SLCMV, experiment 2, season 2020–

2021 (asymptomatic plants). Top: young stem leaves from each plant were collected and analyzed using SLCMV coat protein gene specific primers, as described in Materials and Methods. HB60, R5, KU50: genotype evaluated as described in the main text. Ni: not infected control plant, B: Blank controls, L: 1Kb Plus DNA Ladder (Invitrogen), black arrowheads indicated 650bp.

Table S1: Analyses of variance of disease development (i.e. symptoms) after 60, 150 and 270 days after sowing (DAP), area under disease progress curve (AUDPC) and yield of cassava varieties with and without fertilizer at two different sites during 2018-19 season.

| Source of variation | df | Mean squares          |     |         |     |         |                           |         |     |
|---------------------|----|-----------------------|-----|---------|-----|---------|---------------------------|---------|-----|
|                     |    | Symptom incidence (%) |     |         |     |         |                           |         |     |
|                     |    | 60 DAP                |     | 150 DAP |     | 270 DAP | AUDPC (x10 <sup>3</sup> ) |         |     |
| Replication         | 2  | 166                   |     | 6       |     | 501     |                           | 4237    |     |
| Site (S)            | 1  | 7369                  | **  | 25725   | **  | 53827   | ***                       | 1198836 | **  |
| Error (a)           | 2  | 46                    |     | 30      |     | 49      |                           | 1660    |     |
| Fertilizer (F)      | 1  | 406                   |     | 468     |     | 0       |                           | 10171   |     |
| S x F               | 1  | 109                   |     | 314     |     | 220     |                           | 5197    |     |
| Error (b)           | 4  | 99                    |     | 475     |     | 78      |                           | 8298    |     |
| Variety (V)         | 5  | 968                   | *** | 8055    | *** | 7637    | ***                       | 255679  | *** |
| V x S               | 5  | 96                    |     | 1163    | *** | 2083    | ***                       | 19993   | *** |
| V x F               | 5  | 145                   |     | 96      |     | 36      |                           | 2458    |     |
| V x S x F           | 5  | 213                   |     | 401     | **  | 277     |                           | 11504   | *** |
| Error (c)           | 40 | 126                   |     | 82      |     | 115     |                           | 1861    |     |

Significance codes: \*\*\* <0.001, \*\* <0.01, \* <0.05,

Table S2: Analyses of variance of disease development (i.e. symptoms) after 60, 150, and 270 days after sowing (DAP), and area under disease progress curve (AUDPC) during the 2019-20 and 2020-21 season.

| Year    | Source of variation | df | Mean squares          |          |          |          |  |  |       | AUDPC (10 <sup>3</sup> ) |
|---------|---------------------|----|-----------------------|----------|----------|----------|--|--|-------|--------------------------|
|         |                     |    | Symptom incidence (%) |          |          |          |  |  |       |                          |
|         |                     |    | 30 DAP                | 60 DAP   | 150 DAP  | 270 DAP  |  |  |       |                          |
| 2019-20 | Replication         | 3  |                       | 51       | 161      | 140      |  |  | 2373  |                          |
|         |                     |    |                       |          | 1596     | 1611     |  |  | 55803 |                          |
|         | Variety (V)         | 3  |                       | 3954 *** | 7 ***    | 2 ***    |  |  | 2     | ***                      |
|         | Error (a)           | 9  |                       | 253      | 168      | 128      |  |  | 6252  |                          |
|         | Seed (S)            | 2  |                       | 5331 *** | 1957 **  | 502      |  |  | 80657 | ***                      |
|         | V x S               | 6  |                       | 1680 *** | 1115 **  | 1319 **  |  |  | 51930 | ***                      |
|         | Error (b)           | 24 |                       | 109      | 222      | 242      |  |  | 6638  |                          |
| 2020-21 | Replication         | 3  | 83                    | 555      | 829      | 462      |  |  | 29321 |                          |
|         |                     |    |                       |          |          |          |  |  | 19693 |                          |
|         | Variety (V)         | 3  | 1377 **               | 5092 *** | 4482 **  | 1807 *   |  |  | 5     | **                       |
|         | Error (a)           | 9  | 130                   | 349      | 487      | 372      |  |  | 19139 |                          |
|         |                     |    | 1737                  | 1168     |          |          |  |  | 32293 |                          |
|         | Seed (S)            | 2  | 8 ***                 | 8 ***    | 4303 *** | 2147 *** |  |  | 1     | ***                      |
|         | V x S               | 6  | 1428 ***              | 909      | 936 ***  | 690 **   |  |  | 35187 | ***                      |
|         | Error (b)           | 24 | 116                   | 367      | 131      | 147      |  |  | 4554  |                          |

Significance codes: \*\*\* <0.001, \*\* <0.01, \* <0.05,

Table S3. Starch content (%) of six varieties grown in two sites with and without fertilizer where plants demonstrated symptoms at different time during growth period (i.e. 60, 150 and 270 days after planting) and did not show any symptoms till the harvest (i.e. asymptomatic)

| <b>Site 1</b> |        | Without Fertilizer |            |              |          | With Fertilizer |          |              |  |
|---------------|--------|--------------------|------------|--------------|----------|-----------------|----------|--------------|--|
| Variety       | 60 DAP | 150 DAP            | 270 DAP    | Asymptomatic | 60 DAP   | 150 DAP         | 270 DAP  | Asymptomatic |  |
| KU50          |        |                    | 28.9       | 25.2 ± 0.5   |          |                 |          | 30.8 ± 1.3   |  |
| Rayong5       |        |                    |            | 29.4 ± 2.1   |          |                 |          | 30.3 ± 0.8   |  |
| Huaybong60    |        |                    |            | 28.1 ± 6.3   |          |                 |          | 29.9 ± 1.9   |  |
| KM98-1 (6)    |        |                    |            | 26.6 ± 1.6   |          |                 |          | 28.0 ± 2.0   |  |
| Rayong 11     |        |                    | 30.8 ± 0.5 | 30.8 ± 1.3   |          |                 | 31.7     | 28.0 ± 1.2   |  |
| SC8           |        |                    | 27.5 ± 0.8 |              |          | 25.5 ± 0.7      | 27.5     |              |  |
| <b>Site 2</b> |        | Without Fertilizer |            |              |          | With Fertilizer |          |              |  |
| Variety       | 60 DAP | 150 DAP            | 270 DAP    | Asymptomatic | 60 DAP   | 150 DAP         | 270 DAP  | Asymptomatic |  |
| KU50          |        | 26.1               | 26.6± 0.5  | 26.6±0.5     | 28.9     | 24.1±0.9        | 26.1     | 26.6±1.2     |  |
| Rayong5       |        |                    |            | 27.5         | 28.9     |                 | 28.9±1.4 | 27.5         |  |
| Huaybong60    | 26.1   | 26.8± 0.7          | 28.0±1.2   | 27.5         | 23.5     | 26.2±1.4        | 27.5±0.8 | 28.9         |  |
| KM98-1 (6)    | 20.8   | 26.1               | 26.1       | 26.8±0.7     | 22.8±2.0 | 23.5            | 23.1±2.4 |              |  |
| Rayong 11     |        | 27.5±0.8           |            |              |          | 27.5±0.8        |          |              |  |
| SC8           | 23.5   | 22.6±1.2           | 20.8       |              | 22.1     | 23.5±1.5        |          |              |  |
